# Supplementary material for: Clonal Reproduction and Low Genetic Diversity in Northern Australian Santalum lanceolatum (Santalaceae) Populations Highlights the Need for Genetic Rescue of This Commercially Significant Species
Source: MDPI journal article supplement (doi:10.3390/f12060741), 2021-06-04
Supplement: s1 [file s1]

Supplementary data for Clonal reproduction and low genetic diversity in Northern Australian *Santalum lanceolatum* (*Santalaceae*) populations highlights the need for genetic rescue of this commercially significant species

**Table S1.** List of 22 *Santalum* sp. microsatellite markers (primers) screened for cross-amplification with *Santalum lanceolatum*.

| Primer Name | Forward Sequence       | Reverse Sequence      | Species                     | Source                  |
|-------------|------------------------|-----------------------|-----------------------------|-------------------------|
| mSiCIR39    | AGTGACCCGTAGTTTGAC     | GGAGAGATTGTATTGGAAC   | <i>S. insulare</i>          | LHullier et al., (2006) |
| mSiCIR42    | CGCACAACTAAAAACCCT     | TCGTAATGGATGGCTTCTA   | <i>S. insulare</i>          | LHullier et al., (2006) |
| mSiCIR44    | GCCTTTTTCACTTTTCGC     | ACACCTCACACAGTTCCT    | <i>S. insulare</i>          | LHullier et al., (2006) |
| mSiCIR139   | GTGCTACTTGATACCCAGG    | GGACAACCAGAGGAGAAC    | <i>S. insulare</i>          | LHullier et al., (2006) |
| mSiCIR148   | CATAGAAGTAGTTGGGTTTA   | TTTAGGTAGGATGTTGG     | <i>S. insulare</i>          | LHullier et al., (2006) |
| mSiCIR153   | ATGCTTTTGTGGTGATTC     | GCTTGGAGTATCTTGTGG    | <i>S. insulare</i>          | LHullier et al., (2006) |
| mSiCIR185   | ACAACAACGCATAACCCT     | AAAACAATGGCACTGAGAA   | <i>S. insulare</i>          | LHullier et al., (2006) |
| mSaCIRH09   | GCCTCTGCTTCCTCCCATGTAG | AACTCCATTGTGATTCTCCCA | <i>S. austrocaledonicum</i> | Bottin et al., (2005)   |
| mSaCIRH11   | AGTCACGGAACAGCCAAGC    | CTTCCCTGTGCCTTGTGTA   | <i>S. austrocaledonicum</i> | Bottin et al., (2005)   |
| mSaCIRG01   | GCTCAACCCATTTTATCC     | ACACAGCAGAACTCCAACA   | <i>S. austrocaledonicum</i> | Bottin et al., (2005)   |
| mSaCIRG10   | GTGCTACCTGCTACCTTTTT   | CCAATAACGGCTTCAACTCA  | <i>S. austrocaledonicum</i> | Bottin et al., (2005)   |
| mSaCIRF04   | TCATTACACAGGCATCAGAAA  | CTACCATCCACCACCGACAT  | <i>S. austrocaledonicum</i> | Bottin et al., (2005)   |
| mSaCIRF10   | TTAGGAAAAACATAGCACACT  | GAGCACTTCACCACCATTAC  | <i>S. austrocaledonicum</i> | Bottin et al., (2005)   |

|        |                        |                       |                    |                       |
|--------|------------------------|-----------------------|--------------------|-----------------------|
| SsA004 | AGCTTGTTCCAATTAACCTGTC | AAGGGACGGTAACTTGATGAG | <i>S. spicatum</i> | Millar et al., (2011) |
| SsA103 | ATTGCATAAGCATGATCTTCC  | GCAGAACTTGGTTGGCTACT  | <i>S. spicatum</i> | Millar et al., (2011) |
| SsA105 | TCGCAATTAGAGAAATTCCTC  | GCAGAACTTGGTTGGCTACT  | <i>S. spicatum</i> | Millar et al., (2011) |
| SsA106 | AAGGTTGGTTTTTAGTGTGC   | CATTCTATGGGGGAAATCTC  | <i>S. spicatum</i> | Millar et al., (2011) |
| SsA119 | TTCCTAGACATTGGCACATTG  | GCCCCTAAAGAATTACAGAC  | <i>S. spicatum</i> | Millar et al., (2011) |
| SsB112 | GGAGCAAGCTAAGCACAC     | GCAGCCAAGAAAAATTACTAC | <i>S. spicatum</i> | Millar et al., (2011) |
| SsB122 | AGGTGCGTCTCTTTCATACTA  | CAGTCGTTTCGGTCACA     | <i>S. spicatum</i> | Millar et al., (2011) |
| SsB126 | ACCGCCCGGTTGTATA       | GTGGGTATTCGCTGAGTATG  | <i>S. spicatum</i> | Millar et al., (2011) |
| SsB128 | CCCAAAGCCATTCTTAAAGGT  | CTAAGGGACGAAGCGAAATC  | <i>S. spicatum</i> | Millar et al., (2011) |

**Table S2.** Summary of Micro-checker and ML\_NULLFREQ analysis across 13 loci and eight population of *Santalum lanceolatum*.

| Locus     | Null Present | Oosterhout | Chakraborty | Brookfield 1 | Brookfield 2 | ML_NULLFREQ |
|-----------|--------------|------------|-------------|--------------|--------------|-------------|
| mSiCIR42  | yes          | 0.1496     | 0.2521      | 0.0771       | 0.2183       | 0.006       |
| mSiCIR44  | no           | 0.0577     | 0.0632      | 0.0394       | 0.0394       | 0.142       |
| mSiCIR153 | yes          | 0.2086     | 0.3018      | 0.1886       | 0.3408       | 0.000       |
| mSaCIRH11 | no           | -0.0583    | -0.05       | -0.0458      | 0.0243       | 0.884       |
| mSaCIRF10 | no           | 0.054      | 0.0502      | 0.0349       | 0.1112       | 0.300       |
| SsA106    | no           | 0.0485     | 0.0707      | 0.0129       | 0.0129       | 0.187       |
| Lanc03    | yes          | 0.2479     | 0.6387      | 0.1555       | 0.2894       | 0.000       |
| Lanc07    | no           | 0.0566     | 0.0737      | 0.0386       | 0.0962       | 0.005       |
| Lanc08    | yes          | 0.1809     | 0.5285      | 0.0831       | 0.1423       | 0.000       |
| Lanc09    | no           | 0.0287     | 0.0228      | 0.0187       | 0.0868       | 0.334       |
| mSiCIR33  | yes          | 0.0584     | 0.0635      | 0.0531       | 0.0832       | 0.036       |
| mSaCIRE09 | yes          | 0.0626     | 0.0706      | 0.0566       | 0.0889       | 0.027       |
| mSaCIRH10 | no           | 0.0334     | 0.0236      | 0.0171       | 0.0981       | 0.200       |

**Table S3.** Characterization of twelve microsatellite loci isolated from 135 unique multilocus genotypes of *Santalum lanceolatum* from the Northern Peninsula Area (NPA) of Cape York (Queensland, Australia).

| Locus - GenBank              | Size range (bp) | PIC          | N <sub>A</sub> | H <sub>O</sub> | H <sub>E</sub> | F <sub>IS</sub> |
|------------------------------|-----------------|--------------|----------------|----------------|----------------|-----------------|
| <b>mSiCIR44</b><br>AM113981  | 114-116         | 0.374        | 2              | 0.499          | 0.35           | - 0.424         |
| <b>mSiCIR153</b><br>AM113981 | 282-296         | 0.625        | 5              | 0.326          | 0.431          | 0.244           |
| <b>mSaCIRH11</b><br>AJ831404 | 233-243         | 0.686        | 6              | 0.723          | 0.516          | - 0.403         |
| <b>mSaCIRF10</b><br>AJ831398 | 138-160         | 0.610        | 6              | 0.55           | 0.462          | - 0.19          |
| <b>SsA106</b><br>EU287765    | 204-218         | 0.235        | 3              | 0.108          | 0.11           | 0.017           |
| <b>mSiCIR42</b><br>AM113980  | 210-222         | 0.273        | 6              | 0.23           | 0.243          | 0.051           |
| <b>Lanc07</b><br>HM448039    | 137-161         | 0.384        | 6              | 0.422          | 0.351          | -0.203          |
| <b>Lanc08</b><br>HM448040    | 112-128         | 0.085        | 4              | 0.052          | 0.098          | 0.467           |
| <b>Lanc09</b><br>HM448041    | 166-184         | 0.680        | 8              | 0.557          | 0.489          | - 0.14          |
| <b>mSiCIR33</b><br>AM113978  | 200-234         | 0.756        | 12             | 0.685          | 0.616          | - 0.112         |
| <b>mSaCIRE09</b><br>AJ831397 | 154-172         | 0.741        | 10             | 0.759          | 0.649          | - 0.168         |
| <b>mSaCIRH10</b><br>AJ831403 | 217-237         | 0.555        | 8              | 0.577          | 0.507          | - 0.139         |
| <i>mean</i>                  |                 | <b>0.500</b> | <b>6.33</b>    | <b>0.457</b>   | <b>0.402</b>   | <b>- 0.083</b>  |

PIC - Polymorphic information content, N<sub>A</sub> - number of alleles; H<sub>O</sub> - observed heterozygosity; H<sub>E</sub> - expected heterozygosity; F<sub>IS</sub> - inbreeding coefficient.

**Table S4.** Summary of clonal measures between adult and juvenile *Santalum lanceolatum* populations across the Northern Peninsula Area (NPA), Cape York (Queensland, Australia).

| Population - age class   | N            | G            | G/N         | % Clones     | N <sub>CE</sub> | N <sub>RA</sub> | P <sub>sex</sub> | P <sub>sex</sub> N <sub>gen</sub> |
|--------------------------|--------------|--------------|-------------|--------------|-----------------|-----------------|------------------|-----------------------------------|
| <i>Adults</i>            |              |              |             |              |                 |                 |                  |                                   |
| <b>Bamaga</b>            | 25           | 19           | 0.76        | 24.00        | 2               | 6               | <0.0001          | <0.0001                           |
| <b>Injinoo</b>           | 19           | 7            | 0.37        | 63.16        | 2               | 12              | <0.0001          | <0.0001                           |
| <b>Muttee Heads</b>      | 12           | 5            | 0.42        | 33.33        | 1               | 7               | <0.0001          | <0.0001                           |
| <b>Seisia</b>            | 25           | 21           | 0.84        | 16.00        | 2               | 4               | <0.0001          | <0.0001                           |
| <b>Somersset West</b>    | 15           | 7            | 0.47        | 53.33        | 3               | 8               | <0.0001          | <0.0001                           |
| <b>Somersset East</b>    | 21           | 15           | 0.71        | 28.57        | 3               | 6               | <0.0001          | <0.0001                           |
| <i>mean</i>              | <b>19.20</b> | <b>12.33</b> | <b>0.57</b> | <b>37.96</b> | <b>2.17</b>     | <b>7.17</b>     |                  |                                   |
| <i>Juveniles</i>         |              |              |             |              |                 |                 |                  |                                   |
| <b>Bamaga juveniles</b>  | 19           | 11           | 0.58        | 42.10        | 4               | 12              | <0.0001          | <0.0001                           |
| <b>Injinoo juveniles</b> | 20           | 10           | 0.50        | 50.00        | 3               | 13              | <0.0001          | <0.0001                           |

|                         |           |              |             |              |             |              |         |         |
|-------------------------|-----------|--------------|-------------|--------------|-------------|--------------|---------|---------|
| <b>Seisia juveniles</b> | 21        | 18           | 0.86        | 14.28        | 4           | 7            | <0.0001 | <0.0001 |
| <b>mean</b>             | <b>20</b> | <b>13.00</b> | <b>0.65</b> | <b>35.46</b> | <b>3.67</b> | <b>10.67</b> |         |         |

$N$  – number of sampled trees;  $G$  – number of unique multilocus genotypes;  $G/N$ , mean proportion of distinguishable genotypes;  $N_{GE}$  – number of genets,  $N_{RA}$  – number of ramets;  $P_{sex}$  – probability of encountering genotype more than once by chance;  $P_{sexN_{gen}}$  – probability of finding the MLG in the  $N$  sampling units collected and analysed.

**Table S5.** Summary of private alleles from Cape York (Queensland, Australia) *Santalum lanceolatum* populations.

|                            | Locus                                                              | Private allele count |
|----------------------------|--------------------------------------------------------------------|----------------------|
| <i>Adult subpopulation</i> |                                                                    |                      |
| Bamaga                     | n/a                                                                | 0                    |
| Injinoo                    | mSaCIRF10                                                          | 1                    |
| Muttee Heads               | n/a                                                                | 0                    |
| Seisia                     | Lanc07, Lanc09, mSiCIR33 (x3), mSaCIRE09                           | 6                    |
| Somerset East              | mSiCIR42, mSaCIRF10, Lanc08, mSiCIR153                             | 3                    |
| Somerset West              | mSaCIRH11, Lanc08                                                  | 2                    |
| Rocky Creek                | mSiCIR42, mSiCIR33, mSaCIRE09 (x2)                                 | 4                    |
| Price Creek                | mSiCIR44, mSaCIRF10, Lanc07 (x2), Lanc09, mSiCIR33 (x2), mSaCIRH10 | 8                    |

**Table S6.** Summary of Wrights F-statistics between all combined age class populations and adult v juvenile Cape York (Queensland, Australia) populations of *Santalum lanceolatum*.

|                                     | Among population variation | Among individual variation | Within individual variation | $F_{ST}$ | $F_{IS}$ | $F_{IT}$ |
|-------------------------------------|----------------------------|----------------------------|-----------------------------|----------|----------|----------|
| <b>All populations</b>              | 24%                        | 12%                        | 64%                         | 0.242    | 0.163    | 0.365    |
| <b>Adult v Juvenile populations</b> | 11%                        | 15%                        | 74%                         | 0.110    | 0.167    | 0.259    |

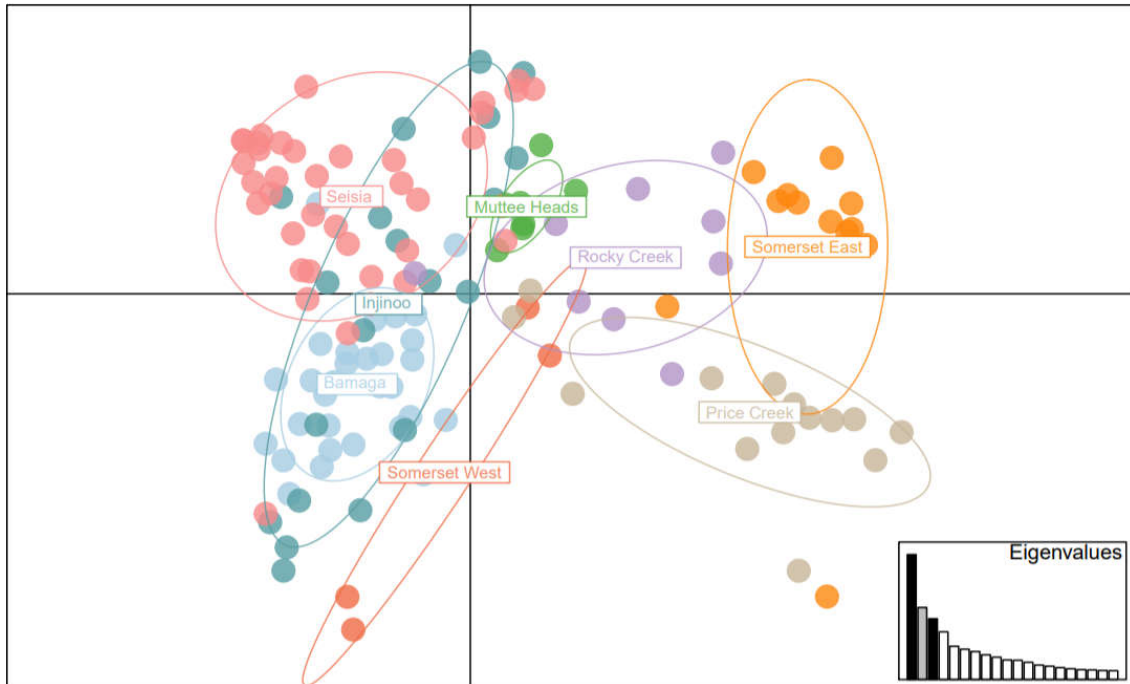

**Figure S1.** Principal coordinates analysis (PCoA) of eight *Santalum lanceolatum* populations using the axes 1 and 3 of genetic distance matrices. Eigenvalues at axes 1 and 3 shown explains 26.77% of variation.

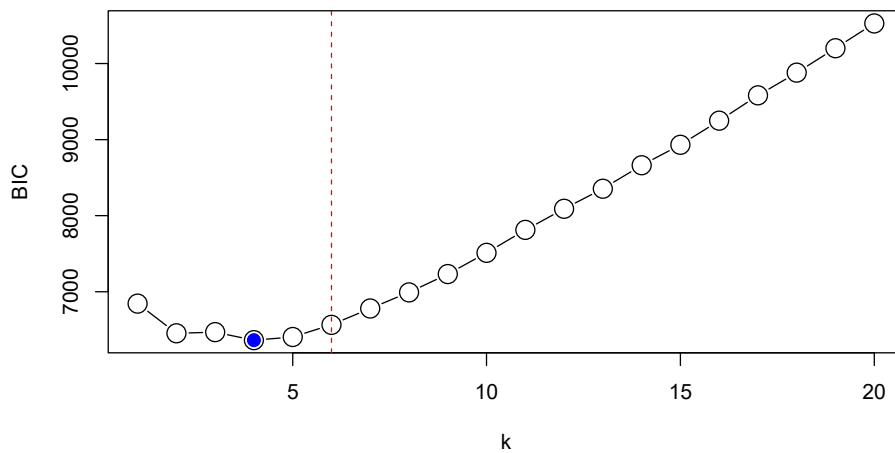

**Figure S2.** Bayesian Information Criterion (BIC) plot from the snapclust command (Adegent, R) displaying BIC values for increasing values of K for eight *Santalum lanceolatum* populations. The blue dot indicates 'optimal k', dashed red line indicates 'true k'.

| K | Reps | Mean LnP(K)  | Stdev LnP(K) | Ln'(K)     | Ln''(K)    | Delta K  |
|---|------|--------------|--------------|------------|------------|----------|
| 1 | 20   | -5556.095000 | 0.336350     | —          | —          | —        |
| 2 | 20   | -4932.540000 | 88.074164    | 623.555000 | 164.460000 | 1.867290 |
| 3 | 20   | -4473.445000 | 82.675653    | 459.095000 | 186.030000 | 2.250118 |
| 4 | 20   | -4200.380000 | 39.030765    | 273.065000 | 133.855000 | 3.429474 |
| 5 | 20   | -4061.170000 | 143.412457   | 139.210000 | 28.685000  | 0.200017 |
| 6 | 20   | -3893.275000 | 108.607991   | 167.895000 | 110.280000 | 1.015395 |
| 7 | 20   | -3835.660000 | 191.086876   | 57.615000  | —          | —        |

**Figure S3.** Output of STRUCTURE validation for increasing values of  $K$  for optimal group selection for eight *Santalum lanceolatum* populations.

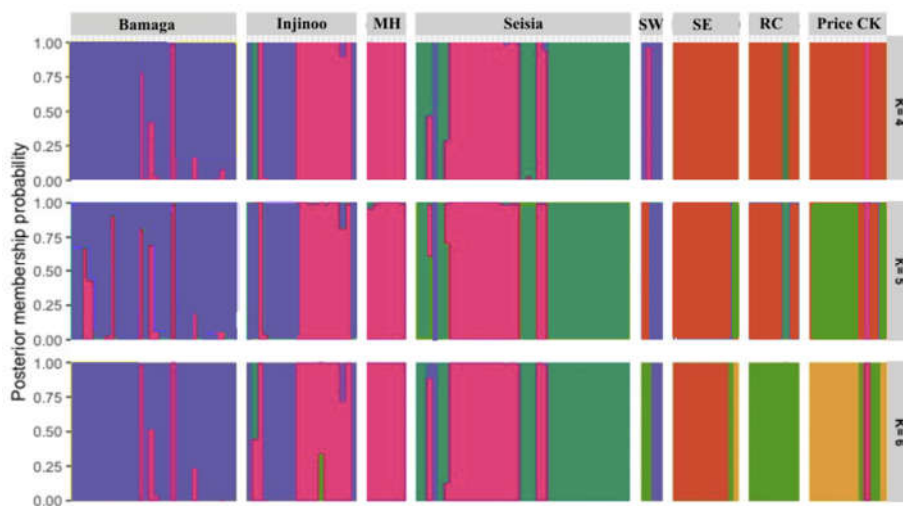

**Figure S4.** Individual admixture coefficients at  $K = 4 - 6$  within and between eight *Santalum lanceolatum* populations from Cape York (Queensland, Australia) inferred using a discriminant analysis of principal components (DAPC). MH = Muttee Heads; SW = Somerset West; SE = Somerset East; RC = Rocky Creek.
